# Supplementary material for: High transparent alternate copolymer of norbornene with isoprene catalyzed by bis(phenoxy–imine) titanium complex
Source: Royal Society of Chemistry journal article supplement (doi:10.1039/c5ra26641f), 2016-01-01
Supplement: c5ra26641f1.pdf [file c5ra26641f1.pdf]

## High Transparent Alternate Copolymer of Norbornene with Isoprene Catalyzed by Bis(phenoxy-imine) Titanium Complex

Jia-Feng Meng, Xin Li, Xu-Feng Ni\*, Zhi-Quan Shen

MOE Key Laboratory of Macromolecular Synthesis and Functionalization, Department of Polymer Science and Engineering  
Zhejiang University  
Hangzhou, 310027, China.

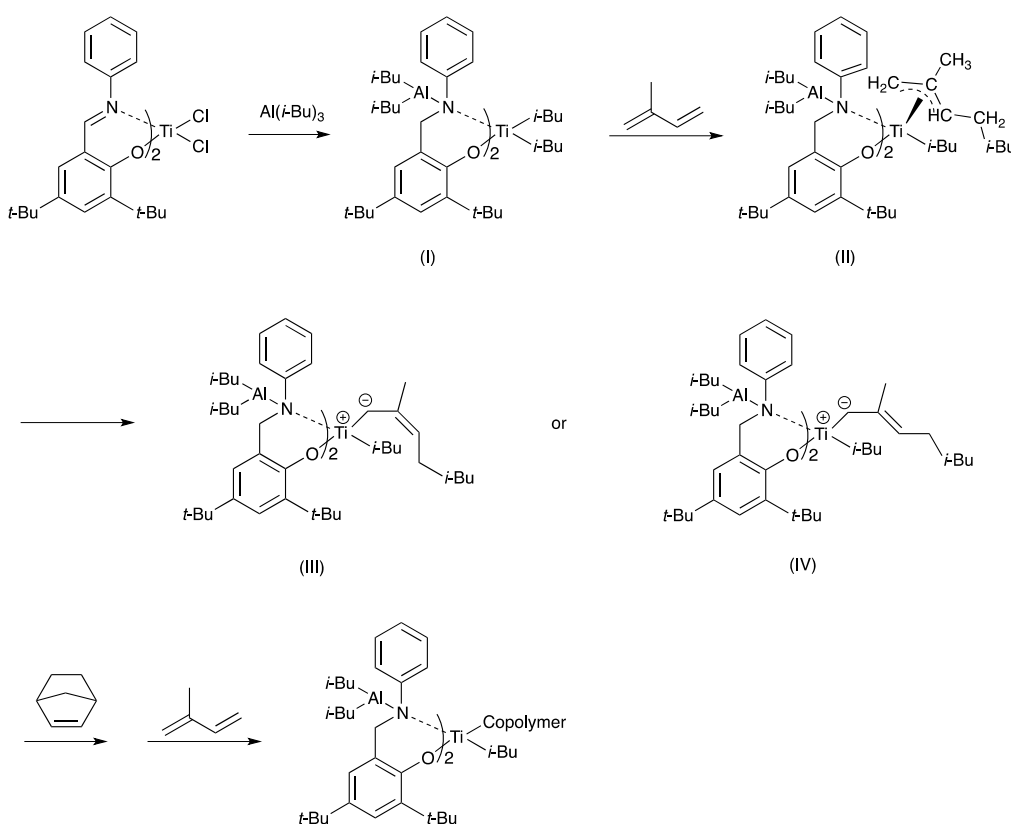

Figure S1: The plausible mechanism for the alternative copolymerization of norbornene with isoprene.

The bis(phenoxy-imine) titanium complex reacts with  $\text{Al}(i\text{-Bu})_3$  generated a phenoxyamine complex in Figure S1(I) as reported <sup>[1]</sup>. This amine nitrogen with an alkylaluminum group is a weak donor, and provides a weak N-Ti interaction and the phenoxyimine complex potentially possesses higher electrophilicity at the Ti center. Therefore, phenoxyamine complex (I) can not catalyze the polymerization. Normally, one of the *i*-Bu groups in (I) is abstracted by Lewis acid such as MAO or  $\text{Ph}_3\text{CB}(\text{C}_6\text{F}_5)_4$  as an anion, and the resulting cationic Ti(IV) species was considered for the active species of coordination polymerization <sup>[1]</sup>. In this study, MAO or  $\text{Ph}_3\text{CB}(\text{C}_6\text{F}_5)_4$  dose not needed for the formation of active species, thus another pathway might be considered as reported <sup>[2]</sup>. Isoprene coordinate on the central Ti atom to form the intermediate III, the insertion of isoprene to the bond between Ti center and *i*-Bu group might produce the  $\pi$ -allyl anion (III) or (VI) and Ti(VI) cation. In general, the copolymer chain growth from  $\pi$ -allyl intermediate (III) or (VI), and the steric hindrance decided insertion order of the two

monomers, leading to an alternative copolymer. The coordination model of isoprene monomer decided the cis-1,4 or trans-1,4 structure of isoprene unit.

### Reference

- 1 a) J. Saito, Y. Suzuki, H. Makio, H. Tanaka, M. Onda and T. Fujita, *Macromolecules*, 2006, **39**, 4023-4031; b) M. Lamberti, M. Consolmagno, M. Mazzeo and C. Pellicchia, *Macromol Rapid Commun*, 2005, **26**, 1866-1871; c) J. Saito, M. Onda, S. Matsui, M. Mitani, R. Furuyama and H. Tanaka, *Macromol Rapid Commun*, 2002, **23**, 1118-1123
- 2 a) X. Ni, W. Zhu, Z. Shen, *Polymer*, 2010, **51**, 2548-2555; b) J.C. Choi, I. Yamaguchi, K. Osakada, T. Yamamoto, *Macromolecules*, 1998, **31**, 8731-8736
